# Supplementary material for: Condensin II drives large-scale folding and spatial partitioning of interphase chromosomes in Drosophila nuclei
Source: PubMed Central journal article supplement (PMC6042687; doi:10.1371/journal.pgen.1007393), 2018-07-12
Supplement: pgen.1007393.s011.pdf [file pgen.1007393.s011.pdf]

## Protocol - amplification of Oligopaints library and probe synthesis

### Step 1: low cycle PCR reaction using raw library as template

#### PCR amplification

1 ul diluted raw library (100-200 pg/ul)  
1.25 ul F primer (20 uM)  
1.25 ul R primer (20 uM)  
21.5 ul H<sub>2</sub>O  
50 ul total

Cycling:  
1. 98°C - 3 min  
2. 98°C - 5 s  
3. 72 °C - 15 s  
4. Repeat 2-5 30x  
5. 72 °C - 2 min  
6. 12 °C - hold

#### PCR clean-up (kit)

- elute in 30ul  
- dilute to 4ng/ul

### Step 2: Adding T7 sites to Oligos

- Add **TAATACGACTCACTATAGGG** to the 5' end of the reverse primer

#### T7 PCR (1X)

2.5 ul 4ng/ul template  
4 ul 10uM F primer  
4 ul 10uM R primer  
20 ul 5x buffer with MgCl<sub>2</sub> added (Invitrogen)  
2 ul dNTPs (10mM)  
0.5 ul taq polymerase (Invitrogen)  
H<sub>2</sub>O to 100 ul  
**100ul** total

Cycling:  
1. 94°C – 3 min  
2. 94°C – 45 sec  
3. 56°C – 30 sec  
4. 72°C – 30 sec  
5. Repeat 2-5 35X  
6. 72°C – 5 min  
7. 12°C - hold

#### PCR clean-up (kit)

- elute in 20ul

### Step 3: *in vitro* transcription

#### T7 RNA synthesis (Hi-Scribe kit)

7 ul clean T7 PCR  
2ul ATP  
2ul CTP  
2ul GTP  
2ul UTP  
2ul T7 buffer  
2ul T7 pol mix  
1ul RNase OUT  
20 ul total  
→ incubate at 37°C O/N

#### **Step 4: conversion of RNA to RNA:DNA duplexes with reverse transcription**

##### RT

- 20ul T7 RNA sample
  - 7.5ul F sec primer (200uM)
  - 9.6 ul dNTPs (100 mM dNTP mix, or 25 mM of each nucleotide)
  - 30 ul 5x RT buffer
  - 1.5ul RNase OUT
  - 2ul Maxima RT-H
  - 79.4ul H2O
  - 150ul total
- incubate at 50°C for 2 hours  
\*heat water bath to 95°C for next step\*

#### **Step 5: RNA degradation and DNA probe purification**

##### Alkaline Hydrolysis

- Make 1:1 mixture of 0.5M EDTA:1M NaOH (need 1:1 ratio with sample [150 ul])
- degrade RNA by adding 150 ul EDTA:NaOH mix and incubating at 95°C for 10 minutes

##### Oligo Clean-up (Zymo-100 DNA Clean and Concentrator Kit)

- For each sample, make a 15mL conical tube containing:
  - 600 ul Oligo binding buffer (D4060-1-40, Zymo)
  - 2400 ul 100% ethanol
  - 300ul sample
- Load onto column and centrifuge or vacuum
- wash 2X with 2mL wash buffer
- spin column dry in microcentrifuge tube (~1min at max speed)
- elute in 150ul dH2O

→ nanodrop to get concentrations and convert to pM
